# Supplementary material for: An adaptive prosthetic socket for people with transtibial amputation
Source: PubMed Central journal article supplement (PMC11096356; doi:10.1038/s41598-024-61234-9), 2024-05-15
Supplement: 41598_2024_61234_MOESM2_ESM.pdf [file 41598_2024_61234_MOESM2_ESM.pdf]

“An adaptive prosthetic socket for people with transtibial amputation”

Joan E. Sanders\*, Andrew C. Vamos, Joseph C. Mertens, Katheryn J. Allyn, Brian G. Larsen,  
Daniel Ballesteros, Horace Wang, Nicholas S. DeGrasse, Joseph L. Garbini, Brian J. Hafner,  
Janna L. Friedly

Supplementary Table S2. Participant characteristics.

| Partic. | Reason for Amp. | Gender | Age | Time since Amp. | BMI (kg/m <sup>2</sup> ) | RL Length | Mid-Limb Circumf. | Shape (cylindrical, bulbous, conical) |
|---------|-----------------|--------|-----|-----------------|--------------------------|-----------|-------------------|---------------------------------------|
| P1      | trauma          | M      | 59  | 13              | 30.1                     | 13.3      | 27.2              | conical                               |
| P2      | trauma          | M      | 57  | 30              | 32.1                     | 11.5      | 35.1              | conical                               |
| P3      | trauma          | M      | 35  | 15              | 36.6                     | 18.0      | 33.8              | conical                               |
| P4      | trauma          | F      | 39  | 16              | 22.7                     | 14.0      | 24.9              | bulbous                               |
| P5      | trauma          | M      | 45  | 17              | 21.2                     | 16.3      | 28.6              | conical                               |
| P6      | trauma          | M      | 78  | 42              | 27.2                     | 18.1      | 28.8              | conical                               |
| P7      | trauma          | M      | 60  | 36              | 23.6                     | 18.5      | 27.6              | conical                               |
| P8      | trauma          | F      | 64  | 42              | 24.1                     | 9.0       | 22.2              | conical short bony                    |
| P9      | vasc., DM       | M      | 65  | 4               | 39.2                     | 19.0      | 31.3              | cylindrical                           |
| P10     | trauma          | M      | 75  | 47              | 26.2                     | 12.3      | 35                | conical                               |
| P11     | trauma          | M      | 56  | 4               | 37.4                     | 16.2      | 32.3              | cylindrical                           |
| P12     | trauma          | M      | 46  | 7               | 24.6                     | 15.6      | 30.7              | cylindrical                           |

Partic.= participant, Amp.= amputation, BMI= body mass index, RL= residual limb, Circumf.= circumference, vasc.= peripheral vascular disease, DM= diabetes mellitus, M= male, F= female

| Partic. | Co-Morbidities                         | Socket Volume (PTB to end) mL | Plant Gain (counts/mm) |
|---------|----------------------------------------|-------------------------------|------------------------|
| P1      | gout, HBP, high cholesterol            | 1235                          | 4327                   |
| P2      | HBP, phantom pain                      | 1331                          | 3774                   |
| P3      | none                                   | 1549                          | NA                     |
| P4      | none                                   | 1269                          | 3049                   |
| P5      | none                                   | 1456                          | 7370                   |
| P6      | HBP, brain cancer treatment            | 1288                          | NA                     |
| P7      | none                                   | 1333                          | 3464                   |
| P8      | stroke, HBP, DM, smoker                | 805                           | 3108                   |
| P9      | DM, HBP, kidney failure, high cholest. | 1550                          | 3105                   |
| P10     | HBP                                    | 907                           | 4185                   |
| P11     | DM, HBP, smoker                        | 1728                          | 1139                   |
| P12     | HBP, smoker                            | 1620                          | 2258                   |

Partic.= participant, PTB= patellar tendon bar, HBP= high blood pressure, DM= diabetes mellitus, cholest.= cholesterol

Supplementary Figure S3. Participant supplemental activity data for each mode.

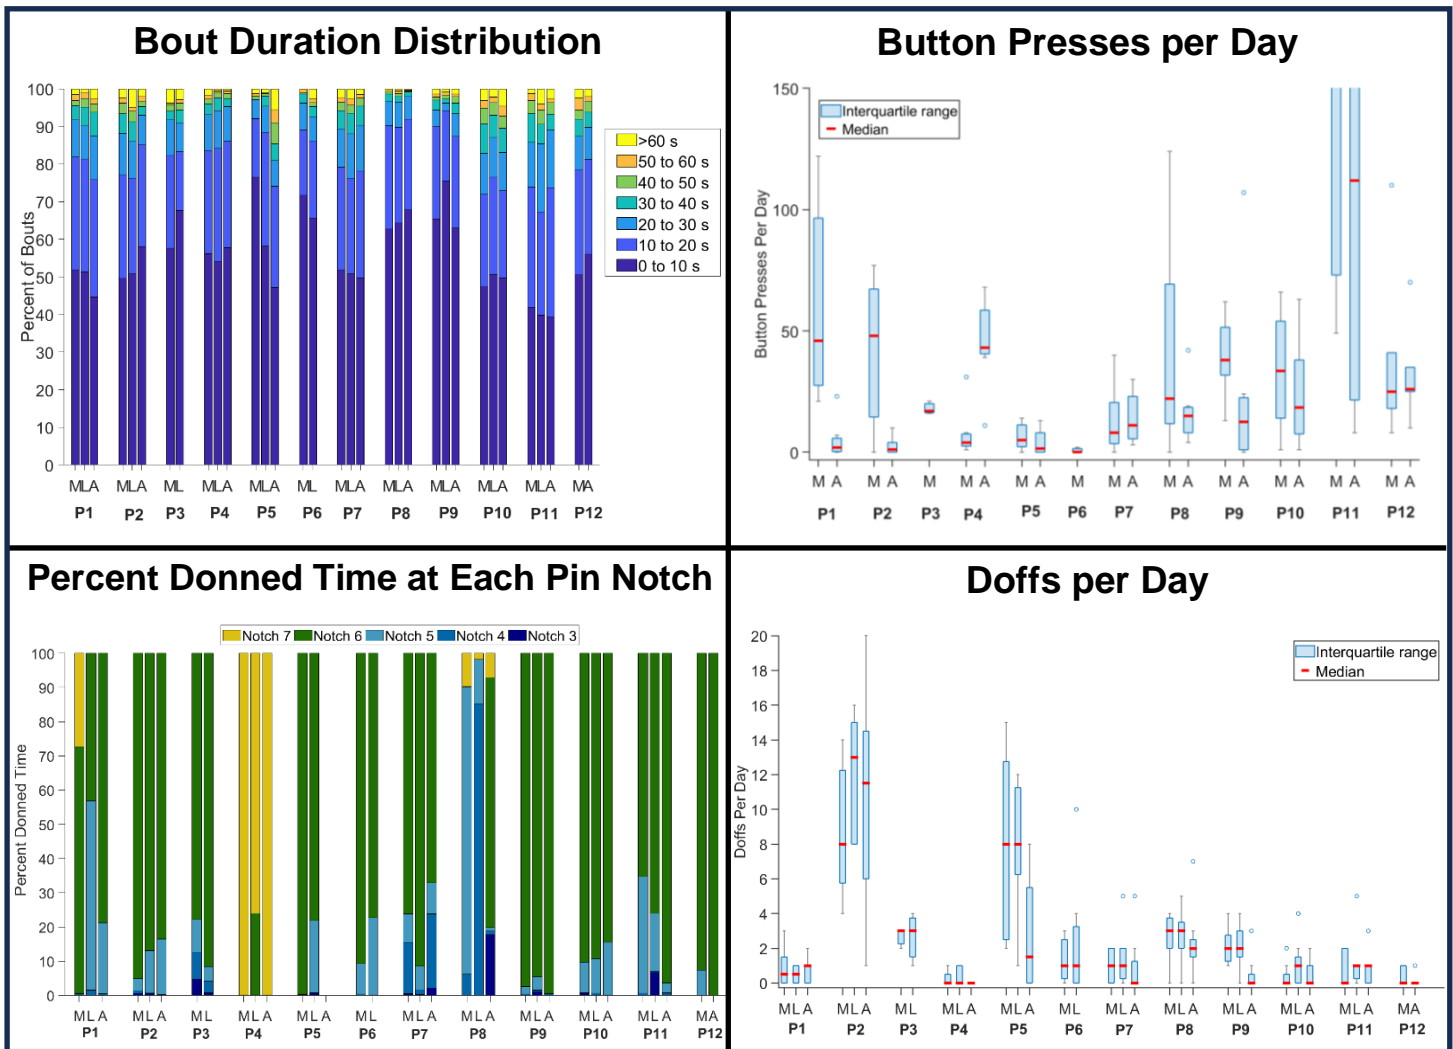

M= manual, L= locked, A= auto, P[#]= participant number

Supplementary Table S4. Participant self-report results.

End of study participant responses

| Participant | Would use prosthesis with smartphone application adjustments | Smartphone application adjustments would limit issues with SOCKET FIT | Would like smartphone application to monitor SOCKET FIT | Would like smartphone application to provide details on SOCKET FIT | Would like to share info with others SOCKET FIT | Would prefer remote fob over smartphone |
|-------------|--------------------------------------------------------------|-----------------------------------------------------------------------|---------------------------------------------------------|--------------------------------------------------------------------|-------------------------------------------------|-----------------------------------------|
| P1          | Disagree                                                     | Disagree                                                              | Neither agree nor disagree                              | Neither agree nor disagree                                         | Neither agree nor disagree                      | Disagree                                |
| P2          | Strongly Agree                                               | Strongly Agree                                                        | Strongly Agree                                          | Strongly agree                                                     | Neither agree nor disagree                      | Neither agree nor disagree              |
| P3          | Strongly Agree                                               | Agree                                                                 | Agree                                                   | Neither agree nor disagree                                         | Strongly Agree                                  | Neither agree nor disagree              |
| P4          | Agree                                                        | Neither agree nor disagree                                            | Agree                                                   | Agree                                                              | Agree                                           | Strongly Agree                          |
| P5          | Strongly Agree                                               | Strongly Agree                                                        | Strongly Agree                                          | Strongly Agree                                                     | Strongly Agree                                  | Neither agree nor disagree              |
| P6          | Agree                                                        | Agree                                                                 | Neither agree or disagree                               | Strongly agree                                                     | Agree                                           | Neither agree nor disagree              |
| P7          | Neither agree nor disagree                                   | Neither agree nor disagree                                            | Disagree                                                | Neither agree nor disagree                                         | Agree                                           | Neither agree nor disagree              |
| P8          | Neither agree nor disagree                                   | Agree                                                                 | Agree                                                   | Strongly agree                                                     | Agree                                           | Strongly Agree                          |
| P9          | Agree                                                        | Agree                                                                 | Agree                                                   | Agree                                                              | Agree                                           | Disagree                                |
| P10         | Strongly Agree                                               | Agree                                                                 | Strongly Agree                                          | Strongly agree                                                     | Strongly Agree                                  | Strongly Disagree                       |
| P11         | Strongly Agree                                               | Strongly Agree                                                        | Agree                                                   | Neither agree nor disagree                                         | Agree                                           | Strongly Agree                          |
| P12         | Agree                                                        | Agree                                                                 | Agree                                                   | Neither agree nor disagree                                         | Agree                                           | Neither agree nor disagree              |

Themes and responses from open-ended interviews

| Partic. | Weight + Size                                                                                                                                                                                                                                                                                                              |
|---------|----------------------------------------------------------------------------------------------------------------------------------------------------------------------------------------------------------------------------------------------------------------------------------------------------------------------------|
| P1      | Less weight                                                                                                                                                                                                                                                                                                                |
| P2      | Good start, now miniaturize it. It needs to be a bit lighter                                                                                                                                                                                                                                                               |
| P4      | Socket size limited my clothing choices                                                                                                                                                                                                                                                                                    |
| P5      | Weight and Size was least favorite                                                                                                                                                                                                                                                                                         |
| P10     | Knocking into things with panels + brackets - would come down on edge of 5-gallon pail and be "air surfing" and hung up on it<br>Cannot kneel<br>Cannot get pants over it                                                                                                                                                  |
| P11     | Not so bulky. If it was lighter it would be so much better                                                                                                                                                                                                                                                                 |
| P12     | Not being able to wear pants over it, so the physical size. I would use something like this if it was more practical. Size and weight make the difference in use. I would not wear it to work in or be active. Only casual/normal activity                                                                                 |
| Partic. | Battery Management                                                                                                                                                                                                                                                                                                         |
| P2      | Wireless charging. Did not like charging at night                                                                                                                                                                                                                                                                          |
| P3      | Battery bar on app for leg % of power                                                                                                                                                                                                                                                                                      |
| P5      | Replaceable batteries or have battery life indicator. Being able to have a second set of batteries charged on me would be good                                                                                                                                                                                             |
| P8      | Battery power made me nervous                                                                                                                                                                                                                                                                                              |
| Partic. | Changes to Controller                                                                                                                                                                                                                                                                                                      |
| P2      | Remember set positions and go to those positions with one push of button                                                                                                                                                                                                                                                   |
| P3      | Individually adjust for panel and release. Neutral 0 setting like release only it tightens to the position for quick donning                                                                                                                                                                                               |
| P4      | If I manually override the auto adjustment, I want it to stay where I put it until my limb changes size for a longer period of time. It's currently too sensitive to the short changes that occur with non-walking movements, like stairs & side stepping. I disliked that auto mode didn't seem to know what fit I wanted |
| P5      | I didn't have to think about it when in auto mode<br>Different modes and smaller + bigger increments. I felt the motors were working too often. If the incremental changes were bigger, the motors wouldn't go on/off as often                                                                                             |
| P10     | Would like the seated auto panel release for relief                                                                                                                                                                                                                                                                        |

| <b>Partic.</b> | <b>Interface/Display</b>                                                                                                                                                                                            |
|----------------|---------------------------------------------------------------------------------------------------------------------------------------------------------------------------------------------------------------------|
| P2             | Control panel on the limb and on the phone. I like the two-step method to release, it makes it safer to have to push the button twice                                                                               |
| P4             | I also would want a watch to make quick adjustments instead of having to empty my hands to pull out the phone                                                                                                       |
| P7             | Do not like having the phone app with you to make the adjustments (would not want to have an accident and break or loose it!)                                                                                       |
| P8             | Instead of phone I would prefer if something like phone can be attached to prosthetic leg                                                                                                                           |
| P11            | Remote key pad                                                                                                                                                                                                      |
| <b>Partic.</b> | <b>Controlling Fit</b>                                                                                                                                                                                              |
| P2             | BEST: The constant good fit                                                                                                                                                                                         |
| P4             | BEST: I like that I could adjust the panels manually                                                                                                                                                                |
| P7             | BEST: Simple to control the fit when you want or need to                                                                                                                                                            |
| P8             | BEST: Using app to adjust comfort                                                                                                                                                                                   |
| P9             | I liked the automatic because it did most of the work but it still allowed me to fine tune the fit. But I do like the total control of the manual, but I think I still prefer the automatic                         |
| P10            | BEST: Ease of adjustment not needing to remove pants                                                                                                                                                                |
| P12            | BEST: Being able to adjust the panels                                                                                                                                                                               |
| <b>Partic.</b> | <b>Other</b>                                                                                                                                                                                                        |
| P7             | The manual release button would be easier to reach, on the inside of the prosthesis<br>The dependance on the pads --when the pads are adjusted to be tight you really feel the pads. There are 3 points of pressure |
| P9             | Something that would make the prosthetic feel like a continuation of the leg - I felt more of the pads as I tightened the socket<br>Want a flexible inner liner for global adjustment                               |

P[#]= participant number

Supplementary Figure S5. Instrumentation.

Socket Sensor

Diagram showing the location of the inductive sensor, antenna, and target in the investigational socket

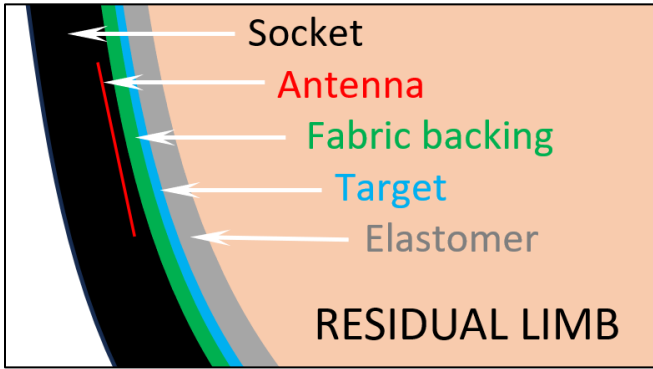

Example socket sensor calibration result

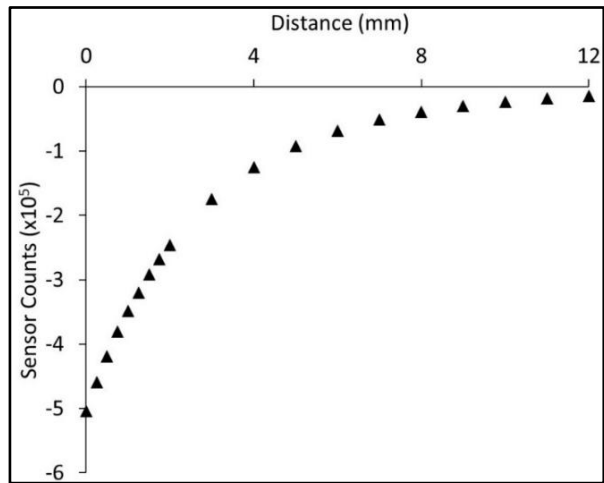

Pin Sensor

Pin sensor with locking pin in the foreground

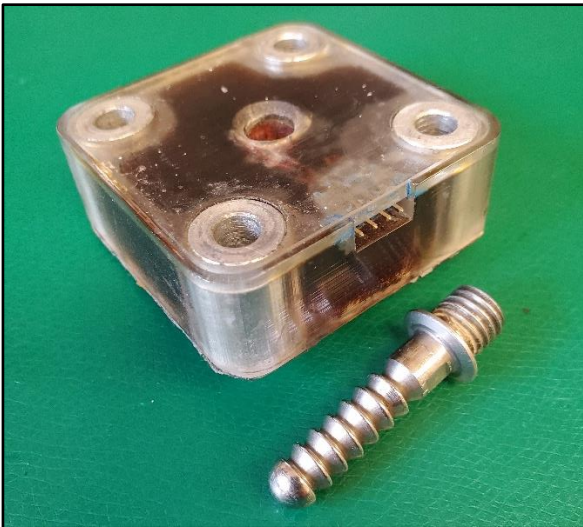

Example pin sensor calibration result

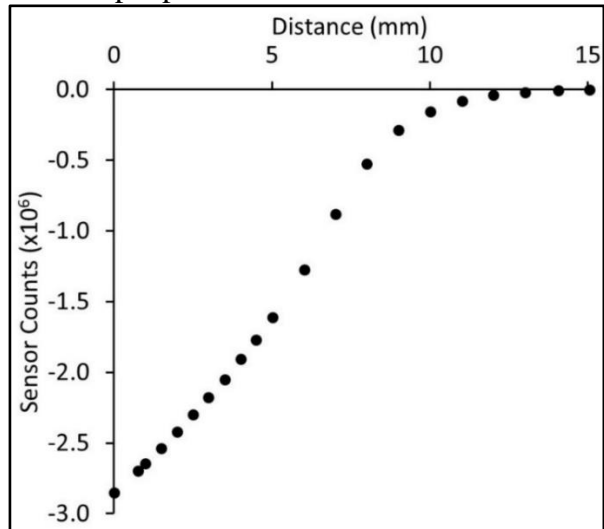

Supplementary Figure S6. Controller design and operation.

The socket fit control loop is shown at the left below. It relates the socket fit set point  $SFM_{ref}(s)$  to the measured  $SFM(s)$ . Uncontrolled changes in the  $SFM(s)$  caused by external factors (disturbances  $D(s)$ ), for example limb volume changes, are to be rejected by the controller. The model parameters are the gain ( $K$ ), which is the effective slope measured during the plant gain test on each participant, and the time constant ( $\tau$ ), which is measured from step responses and is the same for all participants.

As shown at the right below, an increase in limb volume effectively shifts the curve downward, reflecting the tighter fit and decreased SFM. The controller responds by increasing the socket size, traveling up the shifted curve, to restore the SFM.

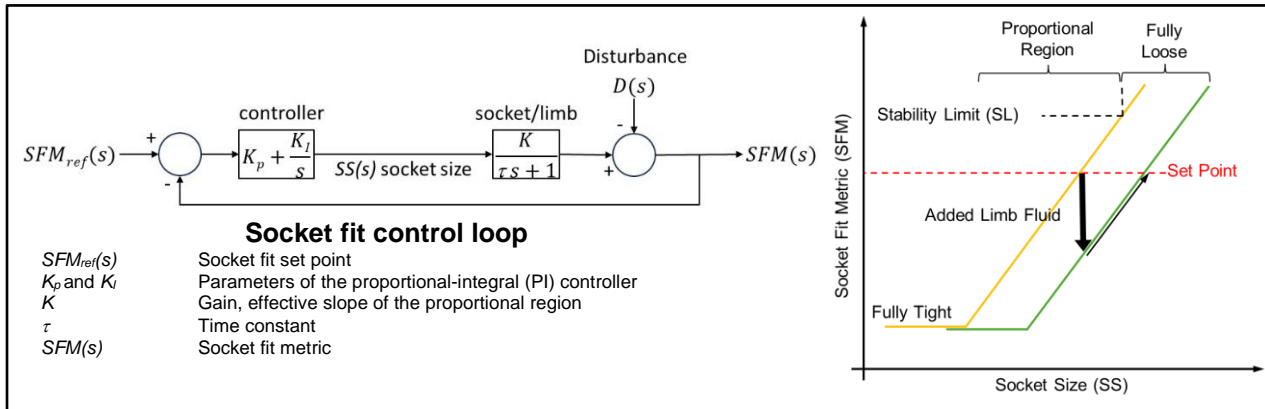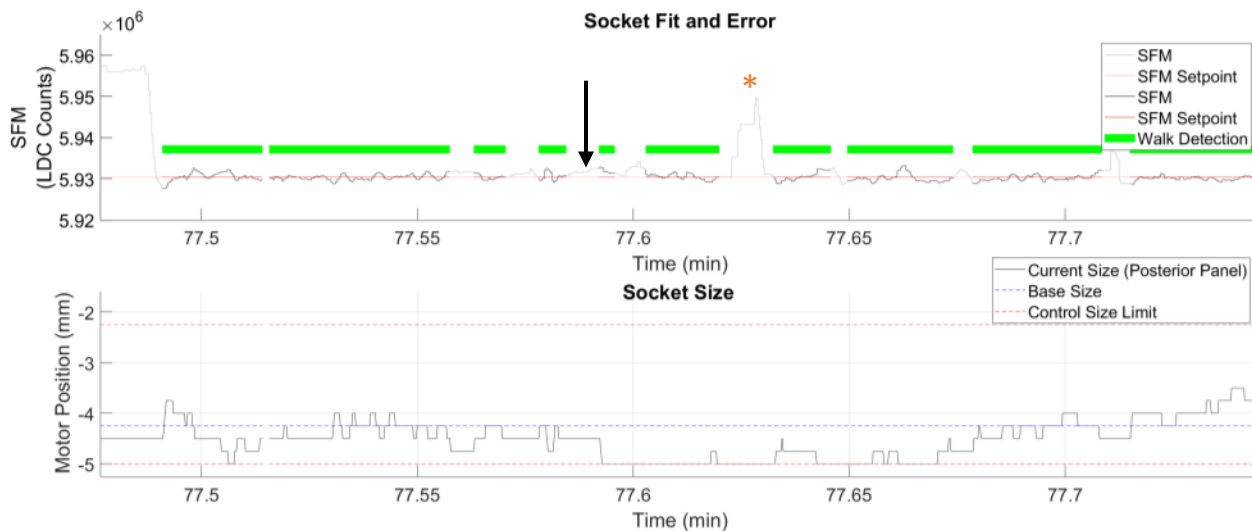

Example controller data. Intermittent walking, standing, and sitting. At the outset the participant is sitting, and then walks intermittently until about 77.63 h where he sits (orange \*). The green lines indicate walking. The black arrow indicates a stand.
